# Supplementary material
Source: PubMed Central journal article supplement (PMC3778493)
Supplement: supp_130269_pain-harman-1-at.pdf [file supp_130269_pain-harman-1-at.pdf]

**Appendix 1 (as supplied by the authors): Descriptive variables for patients included in the 2-week follow-up survey**

|                                                                                                             | Study group; no. (%) children    |                                  | Statistical test used for comparison and p-value                   |
|-------------------------------------------------------------------------------------------------------------|----------------------------------|----------------------------------|--------------------------------------------------------------------|
|                                                                                                             | LET<br>n = 72 (50.35)            | Placebo<br>n = 71 (49.65)        |                                                                    |
| Median (IQR) age in years                                                                                   | 4.33 (2.75, 8.08)                | 3.33 (2.17, 5.17)                | Wilcoxon Rank Sum test p = 0.04                                    |
| Sex, female                                                                                                 | 26 (37.68)                       | 31 (44.29)                       | Chi-square test for association between sex and allocation p = 0.4 |
| Location of laceration<br>- Face<br>- Torso<br>- Extremities<br>- Other                                     | 65 (94.20)<br>-<br>4 (5.80)<br>- | 65 (92.86)<br>-<br>5 (7.14)<br>- | Fisher's exact test p = 1                                          |
| Median (IQR) length of laceration, cm                                                                       | 10.50 (8.00, 15.00)              | 12.00 (10.00, 17.00)             | Wilcoxon Rank Sum test p = 0.1                                     |
| Median (IQR) age of laceration, hours [time of injury to time at triage]                                    | 1.22 (0.67, 1.88)                | 1.08 (0.82, 1.72)                | Wilcoxon Rank Sum test p = 0.6                                     |
| Median (IQR) amount of time LET applied, hours [time LET applied to time at completion of glue application] | 1.08 (0.95, 1.38)                | 1.05 (0.92, 1.33)                | Wilcoxon Rank Sum test p = 0.5                                     |
