# Supplementary material
Source: PubMed Central journal article supplement (PMC3778493)
Supplement: supp_130269_pain-harman-2-at.pdf [file supp_130269_pain-harman-2-at.pdf]

**Appendix 2 (as supplied by the authors): Descriptive variables for per-protocol placebo group versus those surveyed**

|                                                                                                             | Study group; no. (%) children |                             | Statistical test used for comparison and p-value                   |
|-------------------------------------------------------------------------------------------------------------|-------------------------------|-----------------------------|--------------------------------------------------------------------|
|                                                                                                             | Placebo group<br>n = 98 (100) | In survey<br>n = 70 (71.43) |                                                                    |
| Median (IQR) age in years                                                                                   | 3.42 (2.17, 5.25)             | 3.33 (2.17, 5.17)           | Wilcoxon Rank Sum test p = 0.8                                     |
| Sex, female                                                                                                 | 42 (42.86)                    | 31 (44.29)                  | Chi-square test for association between sex and allocation p = 0.9 |
| Location of laceration                                                                                      |                               |                             | Fisher's exact test p = 0.9                                        |
| - Face                                                                                                      | 92 (93.88)                    | 65 (92.86)                  |                                                                    |
| - Torso                                                                                                     | -                             | -                           |                                                                    |
| - Extremities                                                                                               | 5 (5.10)                      | 5 (7.14)                    |                                                                    |
| - Other                                                                                                     | 1 (1.02)                      | -                           |                                                                    |
| Median (IQR) length of laceration, cm                                                                       | 12.00 (10.00, 15.00)          | 12.00 (10.00, 17.00)        | Wilcoxon Rank Sum test p = 0.7                                     |
| Median (IQR) age of laceration, hours [time of injury to time at triage]                                    | 1.12 (0.82, 1.73)             | 1.08 (0.82, 1.72)           | Wilcoxon Rank Sum test p = 0.7                                     |
| Median (IQR) amount of time LET applied, hours [time LET applied to time at completion of glue application] | 1.07 (0.92, 1.33)             | 1.05 (0.92, 1.33)           | Wilcoxon Rank Sum test p = 0.9                                     |
