# Supplementary material
Source: PubMed Central journal article supplement (PMC3778493)
Supplement: supp_130269_pain-harman-3-at.pdf [file supp_130269_pain-harman-3-at.pdf]

**Appendix 3 (as supplied by the authors): Descriptive variables for per-protocol LET group versus those surveyed**

|                                                                                                                | Study group; no. (%) children            |                                  | Statistical test used for comparison and p-value                   |
|----------------------------------------------------------------------------------------------------------------|------------------------------------------|----------------------------------|--------------------------------------------------------------------|
|                                                                                                                | LET group<br>n = 105 (100)               | In survey<br>n = 69 (65.71)      |                                                                    |
| Median (IQR) age in years                                                                                      | 4.25 (2.50, 7.83)                        | 4.33 (2.75, 8.08)                | Wilcoxon Rank Sum test p = 0.7                                     |
| Sex, female                                                                                                    | 40 (38.10)                               | 26 (37.68)                       | Chi-square test for association between sex and allocation p = 0.9 |
| Location of laceration<br>- Face<br>- Torso<br>- Extremities<br>- Other                                        | 100 (95.24)<br>1 (0.95)<br>4 (3.81)<br>- | 65 (94.20)<br>-<br>4 (5.80)<br>- | Fisher's exact test p = 0.8                                        |
| Median (IQR) length of laceration, cm                                                                          | 10.00 (8.00, 15.00)                      | 10.50 (8.00, 15.00)              | Wilcoxon Rank Sum test p = 0.9                                     |
| Median (IQR) age of laceration, hours<br>[time of injury to time at triage]                                    | 1.17 (0.65, 1.92)                        | 1.22 (0.67, 1.88)                | Wilcoxon Rank Sum test p = 0.8                                     |
| Median (IQR) amount of time LET applied, hours<br>[time LET applied to time at completion of glue application] | 1.08 (0.95, 1.35)                        | 1.08 (0.95, 1.38)                | Wilcoxon Rank Sum test p = 0.9                                     |
