# Supplementary material
Source: PubMed Central journal article supplement (PMC3778493)
Supplement: supp_130269_pain-harman-4-at.pdf [file supp_130269_pain-harman-4-at.pdf]

**Appendix 4 (as supplied by the authors): The cross-tabulation of physician’s guess of allocation and actual allocation for all patients with data for both (1 patient from the per-protocol set was missing data for the physician’s guess)**

An application of McNemar’s test yielded a *p* value of 0.04, indicating a significant association between actual allocation and the physician’s ability to guess allocation.

| n<br>percent of total<br>percent of row<br>percent of column | Placebo arm                   | LET arm                       | Totals        |
|--------------------------------------------------------------|-------------------------------|-------------------------------|---------------|
| <b>Guessed placebo arm</b>                                   | 64<br>31.68<br>75.29<br>65.31 | 21<br>10.40<br>24.71<br>20.19 | 85<br>42.08   |
| <b>Guessed LET arm</b>                                       | 34<br>16.83<br>29.06<br>34.69 | 83<br>41.09<br>70.94<br>79.81 | 117<br>57.92  |
| <b>Totals</b>                                                | 98<br>48.51                   | 104<br>51.49                  | 202<br>100.00 |
