# Supplementary material
Source: PubMed Central journal article supplement (PMC3778493)
Supplement: supp_130269_pain-harman-5-at.pdf [file supp_130269_pain-harman-5-at.pdf]

**Appendix 5 (as supplied by the authors): Median (inter-quartile range) for the combinations of guess and actual allocation; the sample size for the calculation is given by n**

We used Wilcoxon tests to check for differences in Colour Visual Analog Scale pain scores within each guessed arm and each actual study arm. For the patients where physicians guessed placebo arm, the difference between study arms was not significant ( $p = 0.7$ ). This was also the case for patients guessed to be in the LET arm ( $p = 0.9$ ). For the patients allocated to the placebo arm, the difference between guessed arms was significant ( $p = 0.0008$ ), as it was for those allocated to the LET arm ( $p = 0.02$ )

|                            | <b>Placebo arm</b>     | <b>LET arm</b>        | <b>For guessed arm</b> |
|----------------------------|------------------------|-----------------------|------------------------|
| <b>Guessed placebo arm</b> | 1.50 (3.00)<br>n = 57  | 1.50 (3.25)<br>n = 17 | 1.50 (3.00)<br>n = 74  |
| <b>Guessed LET arm</b>     | 0.75 (1.00)<br>n = 31  | 0.50 (1.25)<br>n = 80 | 0.50 (1.25)<br>n = 111 |
| <b>For arm</b>             | 1.00 (2.125)<br>n = 88 | 0.50 (1.25)<br>n = 97 |                        |
